# Supplementary material
Source: PubMed Central journal article supplement (PMC7917553)
Supplement: EMBJ-40-e105781-s001.pdf [file EMBJ-40-e105781-s001.pdf]

## **Table of Content**

**Appendix Figure S1:** Sequence discrepancy of IFT54 between the genome and our sequencing data.

**Appendix Figure S2:** GST-pulldown assays for analyzing the interaction between IFT54 and IFT dynein subunits Tctex1, FAP133 or D1bLIC.

**Appendix Table S1:** Primary antibodies used in this study.

A

|              |     |                                                                    |     |
|--------------|-----|--------------------------------------------------------------------|-----|
| New/460-891  | 460 | AAGGAG AAG AAGG AGGAG AAG CCGG CGGAAA AAGAG CCGG GCGG AGGCCT       | 508 |
| V5.5/460-894 | 460 | AAGGAG AAG AAGG AGGAG AAG CCGG CAGAG AAGAG CAGG GCGG AGGCCT        | 508 |
| New/460-891  | 509 | CGCC AG CG CGGAAAAA GGCC CG CGGAG C CGGAGG CAG AAAA G AAG G CAT C  | 557 |
| V5.5/460-894 | 509 | CGCC AG CG CGGAAAAA GGCC CG CGGAG C CGGAGG CAG AAAA G AAG T CAT C  | 557 |
| New/460-891  | 558 | G AG CAAG AG CT CG T CTAGG ACGAAGGAGG AG CCGC CGGC TAAGGCGC CG     | 606 |
| V5.5/460-894 | 558 | G AG CAAG AG CT CG T CTAGG ACGAAGGAGG AG CCGC CGGC TAAGGCGC CG     | 606 |
| New/460-891  | 607 | G CG AAG AAG AAGG AGGAG C CGGCGC CGGAG AAG CCGT CC AAG T CAAAGG    | 655 |
| V5.5/460-894 | 607 | G CG AAG AAG AAGG AGGAG C CGGCGC CGGAG AAG CCGT CC AAG T CAAAGG    | 655 |
| New/460-891  | 656 | CCG CG CCG CAG CTG AGGAAG CG CCGC CG CC - - - G CCGC CG C CTG CCGC | 701 |
| V5.5/460-894 | 656 | CCG CG CCG CAG CTG AGGAAG CG CCGC CG CG CCG CCGC CG C CTG CCGC     | 704 |
| New/460-891  | 702 | GGAG C CG CCG CT CG CT CCGCGT CG C TGGAGG CG AGGACC CG CT CAAC     | 750 |
| V5.5/460-894 | 705 | GGAG C CG CCG CT CG CT CCGCGT CG C TGGAGG CG AGGACC CG CT CAAC     | 753 |
| New/460-891  | 751 | AAG AG CCGC AG TG CCGCGCC AAG T T C CAG CCGCC CACGT CCGCGAGG A     | 799 |
| V5.5/460-894 | 754 | AAG AG CCGC AG TG CCGCGCC AAG T T C CAG CCGCC CACGT CCGCGAGG A     | 802 |
| New/460-891  | 800 | AGG CG CCGC CT CGCGT GCC C CAG CCGC AG CAG CCAAC AAT G CTGG CGGG   | 848 |
| V5.5/460-894 | 803 | AGG CG CCGC CT CGCGT GCC C CAG CCGC AG CAG CCAAC AAT G CTGG CGGG   | 851 |
| New/460-891  | 849 | CACGGGCATT CGCCC CGGCAC CG CG ACC CGGCGACCC AAT G AG               | 891 |
| V5.5/460-894 | 852 | CACGGGCATT CGCCC CGGCAC CG CG ACC CGGCGACCC AAC G AG               | 894 |

B

MCDNWQATIDTLQGASPVFDKPKLSQKLEKPPFRFLHDVVAVQQATGFAPGLYQGDELDGKAIQEKDA  
KVAYLKKIIEVVSMLVGEQCPARPNIIVAGLEPENTNIFLQMLGRACQKGNKAVQKVLGGGAEPAPA  
KEEAPPPEKKPEKKEKKEKPAEKSRAEASPAKKAAPAEAEKKASSKSSSRTEKEPPAKAPAKKKEEPA  
PEKPSKSKAAPAAEEA PPPPPAAEPPARSASPGGEDPLNKSGSAAPKFQRPTSARKAPPRVFPQPQPTM  
LAGTGIRPGTATRRPNEPKPTDSKVTKPVAVFTDNAKDNSDDEVEVVHEQTPVLSGGANMTGEQGVLVKD  
ILAAEKGLKAGVDATADNADTSDQGSTGIILKRLGGKAAGAGAAAAGPRAHDPSSVRELVQKLCHSSTP  
LAKSMDYLQEDIENMRKEYKFWLTEKRMVQDELARELRLQGEAANVDAQLADLDGQIKQARDRIIGMKGQ  
ILRNDELGKLLAMATAGR

**Appendix Figure S1. Sequence discrepancy of IFT54 between the genome and our sequencing data.**

By comparing our sequencing data of genomic DNA and cDNA of *IFT54* with that of *Chlamydomonas* V5.5 in Phytozome, we found some discrepancies. A total of seven changes in the coding sequence were found, which include **five silent changes**, one **missense** change and one deletion. (A) Partial sequence alignment showing where and what changes occur. (B) Deduced amino acids of IFT54 from our data. Highlighted amino acids indicate where the changes occur. Serine at position 185 is changed to alanine; One proline at position 230 is missing in a cluster of seven prolines 227-233, resulting in six prolines (227-232). Because of missing one of the amino acids, the total number of amino acids of IFT54 is 509 aa in stead of 510 aa as reported in Phytozome.

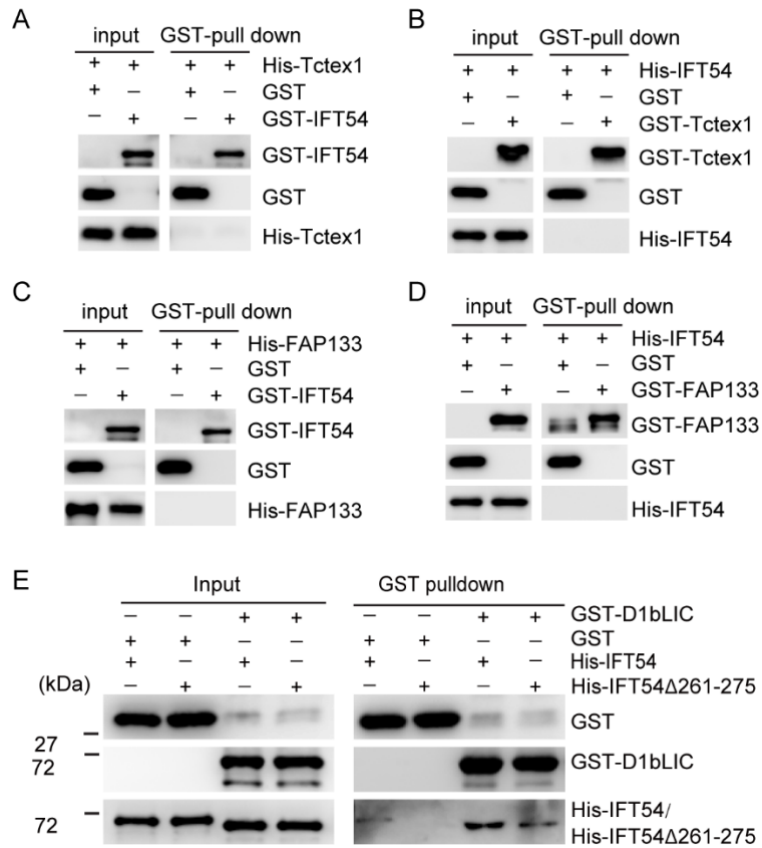

**Appendix Figure S2. GST-pulldown assays for analyzing the interaction between IFT54 and IFT dynein subunits Tctex1, FAP133 or D1bLIC.**

(A-B) Tctex1 does not interact with IFT54. (A) Bacterial expressed GST and GST-IFT54 were mixed with His-Tctex1 respectively followed by GST-pulldown and immunoblotting with anti-GST and anti-His antibodies, respectively. (B) Reciprocally, bacterial expressed GST and GST-Tctex1 were mixed respectively with His-IFT54 followed by GST-pulldown and immunoblotting with anti-GST and anti-His antibodies, respectively (B).

(C-D) FAP133 does not interact with IFT54. (C) Bacterial expressed GST and GST-IFT54 were mixed respectively with His-FAP133 followed by GST-pulldown and immunoblotting with anti-GST and anti-His antibodies, respectively. (D) Reciprocally, bacterial expressed GST and GST-FAP133 were mixed with respectively His-IFT54 followed by GST-pulldown and immunoblotting with anti-GST and anti-His antibodies, respectively.

(E) D1bLIC interacts with IFT54. Bacterial expressed GST and GST-D1bLIC were mixed His-IFT54 or His-IFT54 $\Delta$ 261-275 respectively followed by GST pulldown and immunoblotting with anti-GST and anti-His antibodies, respectively.

**Appendix Table S1. Primary antibodies used in this study**

| Antibody                      | Dilution |       | Reference or source             |
|-------------------------------|----------|-------|---------------------------------|
|                               | IB       | IF    |                                 |
| Rat anti-HA                   | 1:1000   | 1:50  | clone 3F10, Roche               |
| Mouse anti- $\alpha$ -tubulin | 1:3000   | 1:100 | Cat# T6199, Sigma               |
| Mouse anti-IC2                | 1:20000  | NA    | Cat# D6168, Sigma               |
| Mouse anti-GST                | 1:2000   | NA    | Cat# BE2013, Abmart             |
| Mouse anti-His                | 1:2000   | NA    | Cat# BE2019, Abmart             |
| Mouse anti-GFP                | 1:2000   | NA    | Cat# N20004S, Abmart            |
| Mouse anti-IFT139             | 1:10000  | NA    | (Cole et al., 1998)             |
| Rabbit anti-IFT121            | 1:1000   | NA    | (Zhu et al., 2017a)             |
| Rabbit anti-IFT43             | NA       | 1:50  | (Zhu et al., 2017a)             |
| Rabbit anti-IFT172            | 1:2000   | NA    | This study                      |
| Rabbit anti-IFT38             | 1:2000   | 1:50  | (Wu et al., 2018)               |
| Rabbit anti-D1bLIC            | 1:1000   | 1:100 | (Zhu et al., 2017b)             |
| Rabbit anti-FLA8              | 1:2000   | NA    | (Liang et al., 2014)            |
| Rabbit anti-FLA10             | 1:1000   | 1:100 | (Meng and Pan, 2016)            |
| Rabbit anti-KAP               | 1:1000   | NA    | (Liang et al., 2018)            |
| Rabbit anti-KIF3A             | 1:2000   | NA    | Cat# B11259, Abcam              |
| Rabbit anti-DYNC2L1           | 1:2000   | NA    | Cat# 15949-1-AP,<br>Proteintech |

IF, immunofluorescence; NA, not applicable; IB, Immunoblot.

## References

- Cole, D.G., D.R. Diener, A.L. Himmelblau, P.L. Beech, J.C. Fuster, and J.L. Rosenbaum. 1998. Chlamydomonas kinesin-II-dependent intraflagellar transport (IFT): IFT particles contain proteins required for ciliary assembly in *Caenorhabditis elegans* sensory neurons. *J. Cell Biol.* 141:993-1008.
- Liang, Y., Y. Pang, Q. Wu, Z. Hu, X. Han, Y. Xu, H. Deng, and J. Pan. 2014. FLA8/KIF3B phosphorylation regulates kinesin-II interaction with IFT-B to control IFT entry and turnaround. *Dev. Cell.* 30:585-597.
- Liang, Y., X. Zhu, Q. Wu, and J. Pan. 2018. Ciliary Length Sensing Regulates IFT Entry via Changes in FLA8/KIF3B Phosphorylation to Control Ciliary Assembly. *Curr. Biol.* 28:2429-2435 e2423.
- Meng, D., and J. Pan. 2016. A NIMA-related kinase, CNK4, regulates ciliary stability and length. *Mol. Biol. Cell.* 27:838-847.
- Wu, Q., K. Gao, S. Zheng, X. Zhu, Y. Liang, and J. Pan. 2018. Calmodulin regulates a TRP channel (ADF1) and phospholipase C (PLC) to mediate elevation of cytosolic calcium during acidic stress that induces deflagellation in *Chlamydomonas*. *FASEB J.* 32:3689-3699.
- Zhu, B., X. Zhu, L. Wang, Y. Liang, Q. Feng, and J. Pan. 2017a. Functional exploration of the IFT-A complex in intraflagellar transport and ciliogenesis. *PLoS Genet.* 13:e1006627.
- Zhu, X., Y. Liang, F. Gao, and J. Pan. 2017b. IFT54 regulates IFT20 stability but is not essential for tubulin transport during ciliogenesis. *Cell. Mol. Life Sci.* 74:3425-3437.
