# Supplementary material
Source: PubMed Central journal article supplement (PMC7917553)

Source data for Figure 3

Figure 3A

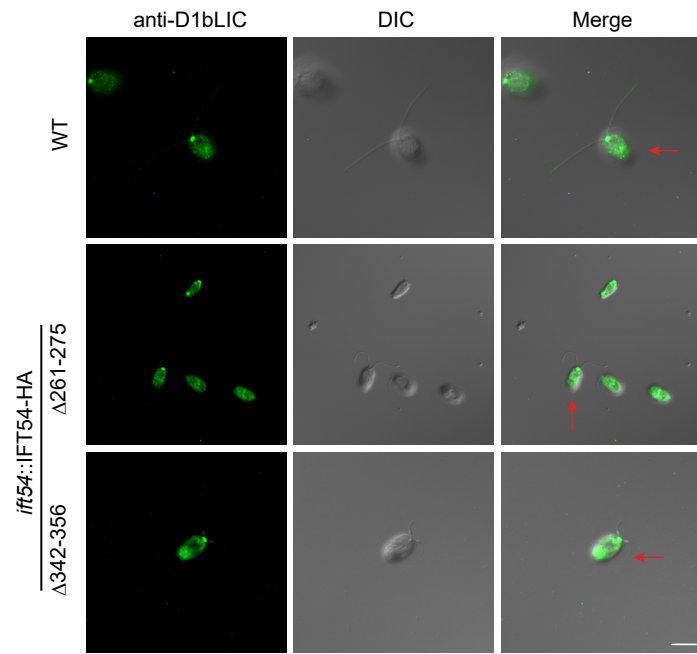

Figure 3B

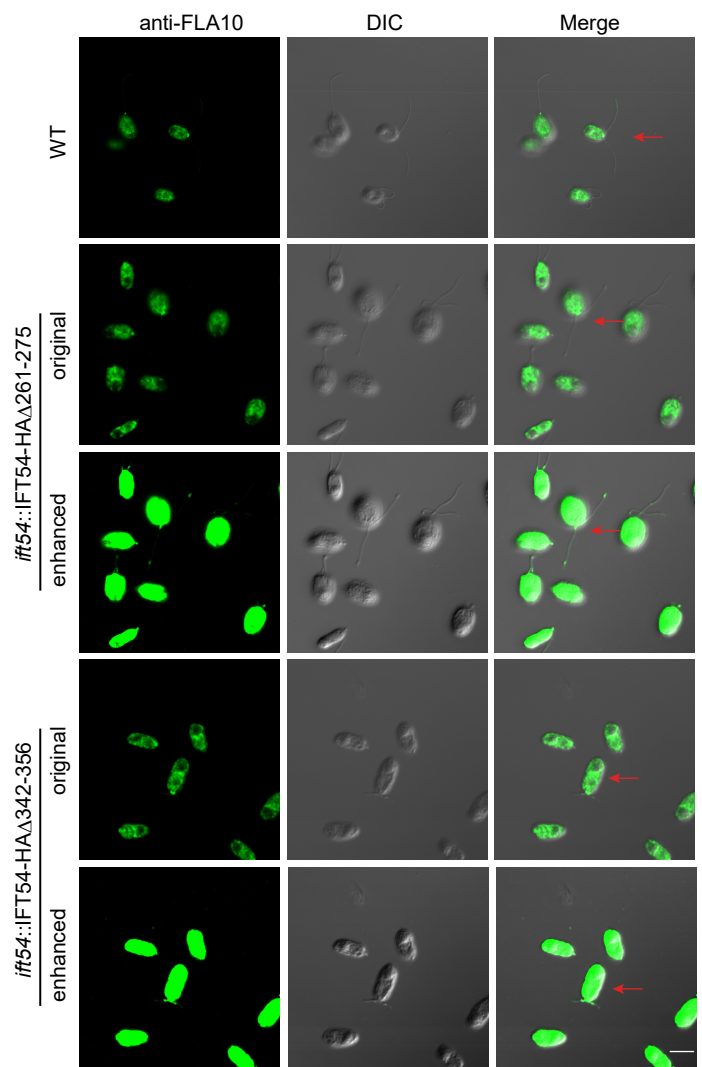

Figure 3D

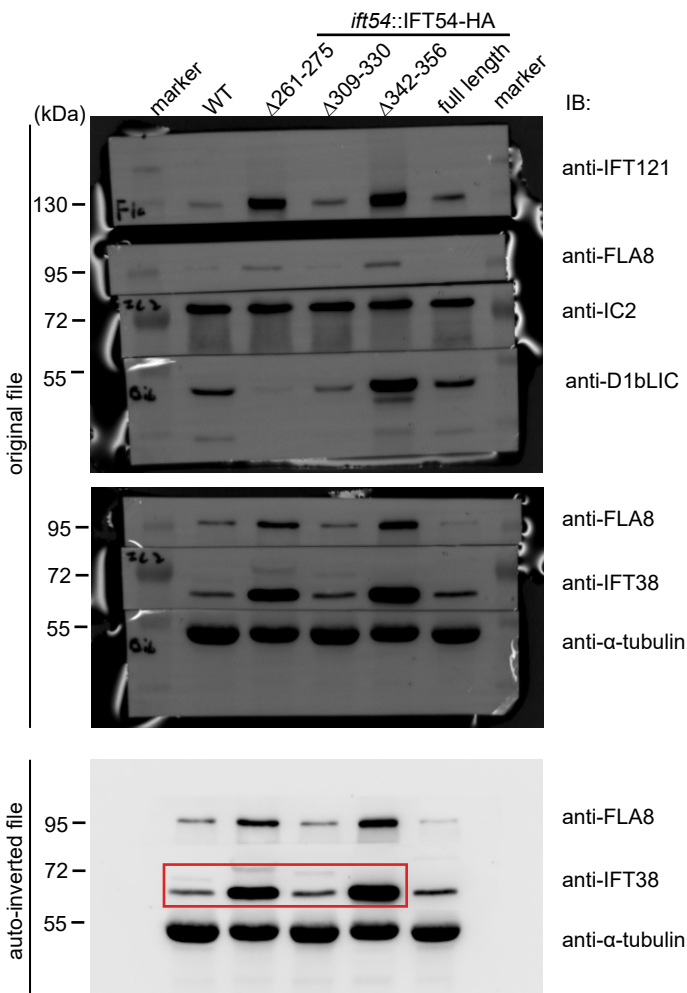

Figure 3C

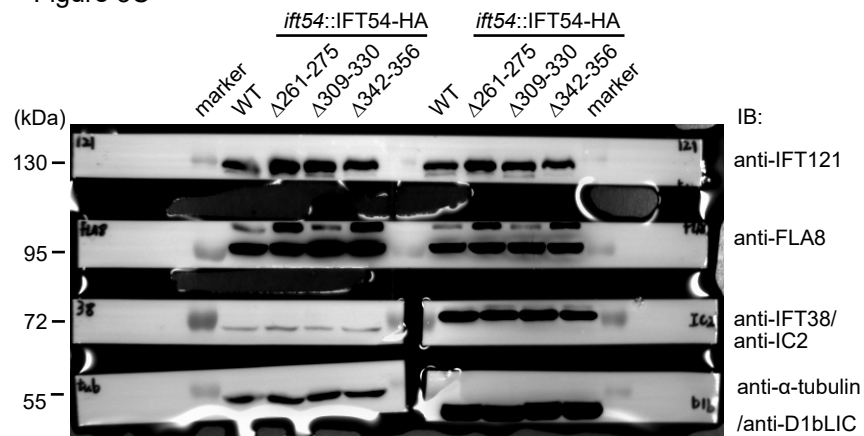

Supplement: EMBJ-40-e105781-s005.pdf [file EMBJ-40-e105781-s005.pdf]
